# Supplementary material
Source: PubMed Central journal article supplement (PMC4621067)
Supplement: JB.00541-15_zjb999093794so1.pdf [file JB.00541-15_zjb999093794so1.pdf]

## **SUPPLEMENTAL MATERIALS**

### **Minimal Peptidoglycan Turnover in Wild-Type and PG Hydrolase and Cell Division Mutants of *Streptococcus pneumoniae* D39 Growing Planktonically and In Host-Relevant Biofilms**

Michael J. Boersma<sup>1</sup>, Erkin Kuru<sup>2</sup>, Jonathan T. Rittichier<sup>2</sup>, Michael S. VanNieuwenhze<sup>2</sup>,  
Yves V. Brun<sup>1</sup>, and Malcolm E. Winkler<sup>\*1</sup>

Departments of Biology<sup>1</sup> and Chemistry<sup>2</sup>, Indiana University Bloomington, Bloomington,  
IN 47405

**TABLE S1.** Bacterial strains used in this study

**TABLE S2.** Oligonucleotide primers used in this study (order follows Table S1)

## **SUPPLEMENTAL FIGURE LEGENDS**

## **REFERENCES FOR SUPPLEMENTAL MATERIALS**

\*Corresponding author: Malcolm E. Winkler  
Department of Biology  
Indiana University Bloomington  
1001 East Third Street - Jordan Hall 142  
Bloomington, Indiana 47405  
Phone: 812-856-1318  
E-mail: [winklerm@indiana.edu](mailto:winklerm@indiana.edu)

**TABLE S1.** *Streptococcus pneumoniae* strains used in this study<sup>a</sup>

| Strain number | Genotype (description) <sup>b</sup>                                                                                                                                                   | Antibiotic Resistance <sup>c</sup> | Reference or source      |
|---------------|---------------------------------------------------------------------------------------------------------------------------------------------------------------------------------------|------------------------------------|--------------------------|
| EL59          | R6                                                                                                                                                                                    | None                               | (1)                      |
| IU1690        | D39                                                                                                                                                                                   | None                               | (1)                      |
| IU1824        | D39 $\Delta cps$ <i>rpsL</i> 1                                                                                                                                                        | Str <sup>R</sup>                   | (1)                      |
| IU1868        | TIGR4                                                                                                                                                                                 | None                               | (2)                      |
| IU1945        | D39 $\Delta cps$                                                                                                                                                                      | None                               | (1)                      |
| IU2336        | D39 $\Delta cps$ <i>kan</i> -t1t2- <i>P<sub>c</sub>-pcsB</i> <sup>+</sup>                                                                                                             | Kan <sup>R</sup>                   | (3)                      |
| IU3766        | D39 $\Delta lytA$ <> <i>P<sub>c</sub>-aad9</i>                                                                                                                                        | Spec <sup>R</sup>                  | (4)                      |
| IU3875        | D39 $\Delta cps$ $\Delta pmp23$ <> <i>P<sub>c</sub>-kan</i>                                                                                                                           | Kan <sup>R</sup>                   | (4)                      |
| IU3877        | D39 $\Delta cps$ $\Delta lytB$ <> <i>P<sub>c</sub>-kan-rpsL</i> <sup>+</sup>                                                                                                          | Kan <sup>R</sup>                   | (4)                      |
| IU3880        | D39 $\Delta cps$ $\Delta dacB$ <> <i>P<sub>c</sub>-kan-rpsL</i> <sup>+</sup>                                                                                                          | Kan <sup>R</sup>                   | (4)                      |
| IU3881        | D39 $\Delta cps$ $\Delta spd$ 0703<> <i>kan</i>                                                                                                                                       | Kan <sup>R</sup>                   | (4)                      |
| IU3900        | D39 $\Delta cps$ $\Delta lytA$ <> <i>P<sub>c</sub>-aad9</i>                                                                                                                           | Spec <sup>R</sup>                  | (4)                      |
| IU5648        | $\Delta cps$ <i>rpsL</i> 1 <i>divIVA</i> <sup>+</sup> - <i>P<sub>c</sub>-kan-rpsL</i> <sup>+</sup>                                                                                    | Kan <sup>R</sup>                   | H.-C. Tsui (unpublished) |
| IU5661        | D39 $\Delta cps$ <i>rpsL</i> 1 $\Delta divIVA$ (IU5648 transformed with markerless $\Delta divIVA$ amplicon)                                                                          | Str <sup>R</sup>                   | This study               |
| IU6647        | D39 $\Delta cps$ $\Delta pbp1a$ :: <i>P<sub>c</sub>-erm</i> (IU1945 transformed with $\Delta pbp1a$ :: <i>P<sub>c</sub>-erm</i> amplicon)                                             | Erm <sup>R</sup>                   | This study               |
| IU7204        | D39 $\Delta cps$ $\Delta dacA$ :: <i>P<sub>c</sub>-kan-rpsL</i> <sup>+</sup> (IU1945 transformed with $\Delta dacA$ :: <i>P<sub>c</sub>-kan-rpsL</i> <sup>+</sup> amplicon)           | Kan <sup>R</sup>                   | This study               |
| IU9086        | $\Delta cps$ <i>rpsL</i> 1 $\Delta mapZ$ :: <i>P<sub>c</sub>-kan-rpsL</i> <sup>+</sup> (IU1824 transformed with $\Delta mapZ$ :: <i>P<sub>c</sub>-kan-rpsL</i> <sup>+</sup> amplicon) | Kan <sup>R</sup>                   | A. Perez (unpublished)   |
| IU9175        | D39 $\Delta cps$ <i>rpsL</i> 1 $\Delta mapZ$ (IU9086 transformed with markerless $\Delta mapZ$ amplicon)                                                                              | Str <sup>R</sup>                   | This study               |
| IU9709        | D39 $\Delta cps$ $\Delta murMN$ :: <i>P<sub>c</sub>-erm</i> (IU1945 transformed with $\Delta murMN$ :: <i>P<sub>c</sub>-erm</i> amplicon)                                             | Erm <sup>R</sup>                   | This study               |
| K270          | D39 $\Delta cps$ $\Delta pgdA$ :: <i>P<sub>c</sub>-kan-rpsL</i> <sup>+</sup> (IU1945 transformed with $\Delta pgdA$ :: <i>P<sub>c</sub>-kan-rpsL</i> <sup>+</sup> amplicon)           | Kan <sup>R</sup>                   | This study               |
| K447          | D39 $\Delta cps$ $\Delta adr$ :: <i>P<sub>c</sub>-kan-rpsL</i> <sup>+</sup> (IU1945 transformed with $\Delta adr$ :: <i>P<sub>c</sub>-kan-rpsL</i> <sup>+</sup> amplicon)             | Kan <sup>R</sup>                   | This study               |

<sup>a</sup>Strains were constructed and characterized as described in Materials and Methods.

<sup>b</sup>Primers used to synthesize fusion amplicons are listed in Table S2.

<sup>c</sup>Antibiotic resistance markers: Erm<sup>R</sup>, erythromycin; Kan<sup>R</sup>, kanamycin; Spec<sup>R</sup>, spectinomycin; Str<sup>R</sup>, streptomycin.

**TABLE S2.** Oligonucleotide primers used in this study (order follows Table S1)

| Primer                                                                    | Sequence (5' to 3')                                              | Template <sup>a</sup>                                           | Amplicon Product                                    |
|---------------------------------------------------------------------------|------------------------------------------------------------------|-----------------------------------------------------------------|-----------------------------------------------------|
| For construction of IU5661 ( <i>Δcps ΔdivIVA</i> )                        |                                                                  |                                                                 |                                                     |
| LIIR-015                                                                  | TGGATAAAGAAGGTAGAAGATAGCTATGCTC                                  | D39                                                             | 5' upstream fragment                                |
| SC238                                                                     | TAACCGTCCAGTTATTATTAAGTAAGTGATAGC<br>TCCAGTGCATCCGACAGGTCCAAC    |                                                                 |                                                     |
| SC237                                                                     | CCGTCCAGTTATTATTAAGTAAGTGATAGCTCC<br>AGTGCACCGACAGGTCCAACACCAG   | D39                                                             | 3' downstream fragment                              |
| LIIF-013                                                                  | CACGTTGGACATGCTATGAACAAGATT                                      |                                                                 |                                                     |
| For construction of IU6647 ( <i>Δcps Δpbp1a::Pc-erm</i> )                 |                                                                  |                                                                 |                                                     |
| P234                                                                      | CCCTTGTGTTTCATAGCGAGGATAAGCA                                     | D39                                                             | 5' upstream fragment with 60nt of 5' <i>pbp1a</i>   |
| P236                                                                      | CATTATCCATTAAAAATCAAACGGATCCTACAAGC<br>TTAAGAAGCTAATGCTCAGATACTT |                                                                 |                                                     |
| Erm Forward                                                               | ATGAACAAAAATATAAAATATTCTCAAACTTT                                 | <i>P<sub>c</sub>-erm</i> cassette <sup>b</sup>                  | <i>P<sub>c</sub>-erm</i> cassette                   |
| Erm reverse                                                               | TTATTTCTCTCCCGTTAAATAATAGATAACTAT                                |                                                                 |                                                     |
| P237                                                                      | CAAAAGCATAAGGAAAGGGGCCCAACAATCAAA<br>TACAACCCCTGATCAACAAAATC     | D39                                                             | 60 nt of 3' <i>pbp1a</i> and 3' downstream fragment |
| P235                                                                      | AGGCAAGCCTGCAACCATGGTCTTGAAA                                     |                                                                 |                                                     |
| For construction of IU7204 ( <i>Δcps ΔdacA::Pc-kan-rpsL<sup>+</sup></i> ) |                                                                  |                                                                 |                                                     |
| P150                                                                      | AGCCTGCAATATGCAAGCGATCCCTCTT                                     | D39                                                             | 5' upstream fragment with 60nt of 5' <i>dacA</i>    |
| P152                                                                      | CATTATCCATTAAAAATCAAACGGATCCTAAGCAG<br>TAGAAACACCCCCTAAAAGAGAGAC |                                                                 |                                                     |
| Kan rpsL forward                                                          | TAGGATCCGTTTGATTTTTAATGGATAATG                                   | <i>P<sub>c</sub>-kan-rpsL<sup>+</sup></i> cassette <sup>b</sup> | <i>P<sub>c</sub>-kan-rpsL<sup>+</sup></i> cassette  |
| Kan rpsL reverse                                                          | GGGCCCTTTCTTATGCTTTTG                                            |                                                                 |                                                     |
| P153                                                                      | CAAAAGCATAAGGAAAGGGGCCCTTCTTCTTAAAA<br>GTTTGGTGGAAATCAGTTTG      | D39                                                             | 60 nt of 3' <i>dacA</i> and 3' downstream fragment  |
| P151                                                                      | TATCGTTGATGAGGGAGCAAGCGTCCACTA                                   |                                                                 |                                                     |
| For construction of IU9175 ( <i>Δcps ΔmapZ</i> )                          |                                                                  |                                                                 |                                                     |
| P1523                                                                     | GAGGTCTCTATTCTCAAAGATGTGGCAACTGTC                                | D39                                                             | 5' upstream fragment                                |
| AJP92                                                                     | CCGACAAAGTAGCCTGTCTTACAATCAAATTGCGG<br>TTCTTGAGCTTCT             |                                                                 |                                                     |
| AJP93                                                                     | GCTCAAGAACCGCAATTTGATTGTAAGACAGGCTA<br>CTTTGTCGGAAATGGC          | D39                                                             | 3' downstream fragment                              |
| P1526                                                                     | AATTGCATATCACCGTACTCAATACCATTGTG                                 |                                                                 |                                                     |

| For construction of IU9709 ( $\Delta cps \Delta murMN::P_{erm}$ )         |                                                                   |                                                                     |                                                        |
|---------------------------------------------------------------------------|-------------------------------------------------------------------|---------------------------------------------------------------------|--------------------------------------------------------|
| P1535                                                                     | GGGTGAATGTCCTCTACCCTGATGCCAATC                                    | D39                                                                 | 5' upstream fragment with 60nt of 5' <i>murMN</i>      |
| P1536                                                                     | ACATTATCCATTAAAAATCAAACGGATCCTAGGCT<br>AATTCATGT TCTTTGACAAACTGAT |                                                                     |                                                        |
| Erm Forward                                                               | ATGAACAAAAATATAAAATATTCTCAAACTTT                                  | P- <i>erm</i> cassette <sup>b</sup>                                 | P- <i>erm</i> cassette                                 |
| Erm reverse                                                               | TTATTTCTCCCGTTAAATAATAGATAACTAT                                   |                                                                     |                                                        |
| P1537                                                                     | CAAAAGCATAAGGAAAGGGGCCCATCCATCTCC<br>TTTAAAATACAAAGCTATCC         | D39                                                                 | 60 nt of 3' <i>murMN</i> and 3' downstream fragment    |
| P1538                                                                     | GCCTCTGTCTTGGTATCATGACTTCCACGAA                                   |                                                                     |                                                        |
| For construction of K270 ( $\Delta cps \Delta pgdA::P_{c-kan-rpsL}^{+}$ ) |                                                                   |                                                                     |                                                        |
| P632                                                                      | TGAAATGATGGCTGATAGCGCCAGTTCCGA                                    | D39                                                                 | 5' upstream fragment with 60nt of 5' <i>pgdA</i>       |
| P634                                                                      | CATTATCCATTAAAAATCAAACGGATCCTATTTCCC<br>GTGTCTGCCACGTCC           |                                                                     |                                                        |
| Kan rpsL forward                                                          | TAGGATCCGTTTGATTTTAAATGGATAATG                                    | P <sub>c</sub> - <i>kan-rpsL</i> <sup>+</sup> cassette <sup>b</sup> | P <sub>c</sub> - <i>kan-rpsL</i> <sup>+</sup> cassette |
| Kan rpsL reverse                                                          | GGGCCCTTTCTTATGCTTTTG                                             |                                                                     |                                                        |
| P635                                                                      | CAAAAGCATAAGGAAAGGGGCCAGATGCTCAAT<br>ACTCGCCTAAAAGCTC             | D39                                                                 | 60 nt of 3' <i>pgdA</i> and 3' downstream fragment     |
| P633                                                                      | AACTCGTGGAGCACCCGATTGAACAGCAAT                                    |                                                                     |                                                        |
| For construction of K447 ( $\Delta cps \Delta adr::P_{c-kan-rpsL}^{+}$ )  |                                                                   |                                                                     |                                                        |
| P981                                                                      | TCACCGTCGTCCACATGACCAAGGTTTGTT                                    | D39                                                                 | 5' upstream fragment with 60nt of 5' <i>adr</i>        |
| P983                                                                      | CATTATCCATTAAAAATCAAACGGATCCTAATACAA<br>GAGTACCAAAGTAAACCTATA     |                                                                     |                                                        |
| Kan rpsL forward                                                          | TAGGATCCGTTTGATTTTAAATGGATAATG                                    | P <sub>c</sub> - <i>kan-rpsL</i> <sup>+</sup> cassette <sup>b</sup> | P <sub>c</sub> - <i>kan-rpsL</i> <sup>+</sup> cassette |
| Kan rpsL reverse                                                          | GGGCCCTTTCTTATGCTTTTG                                             |                                                                     |                                                        |
| P984                                                                      | CAAAAGCATAAGGAAAGGGGCCGACGATACGAT<br>TGCCACAGCTTTG                | D39                                                                 | 60 nt of 3' <i>adr</i> and 3' downstream fragment      |
| P982                                                                      | ACCTGTGATTTGAGGCGTGACGTTCCATT                                     |                                                                     |                                                        |

<sup>a</sup>Genomic DNA of the indicated *S. pneumoniae* strains was used as templates for PCR reactions, except for P<sub>c</sub>-*erm* and P<sub>c</sub>-*kan-rpsL*<sup>+</sup> cassettes.

<sup>b</sup>P<sub>c</sub>-*erm* and P<sub>c</sub>-*kan-rpsL*<sup>+</sup> cassettes are described in (5).

## SUPPLEMENTAL FIGURE LEGENDS

**FIG S1.** Unlabeled cell poles of *S. pneumoniae* do not acquire new labeling. Cells of parent strain IU1945 (D39  $\Delta cps$ ) were grown exponentially in BHI broth, labeled with HADA (pseudocolored green) for 30 min (A) or 105 min (B), washed, and chased in the presence of TADA (pseudocolored red) for 5 min as described in Materials and Methods. Live cells were imaged by epi-fluorescence phase-contrast microscopy, and arrows in (A) indicate blank hemispheres (“flattops”) that were not labeled by HADA in 30 min and that are bordered by a red TADA band of new PG synthesis. Minimal variation in labeling patterns was observed for >300 individual cells in diplococci or short chains examined in microscopic fields, and representative images are shown. Scale bar = 1  $\mu$ m. Fluorescence overlays of HADA and TADA labeling and phase overlays of HADA, TADA, and phase-contrast images are shown.

**FIG S2.** Similar unlabeled PG peptide profiles in parent strain IU1945 (D39  $\Delta cps$ ) (A) and isogenic mutant IU7204 (D39  $\Delta dacA$ ) (B), which lacks the D,D-carboxypeptidase that converts PG pentapeptides to PG tetrapeptides. Bacteria were grown in BHI broth without labeling (red lines) or with HADA labeling (blue lines), and PG was purified and PG peptides released with purified LytA amidase as described in Materials and Methods. HPLC was used to resolve PG peptides using the gradient conditions described in (6) with UV absorbance detection at 210 nm ( $A_{210}$ ). Different chromatograms are offset on the same x-time axis for comparisons of unlabeled and labeled samples. Arrows indicate peaks of HADA-labeled PG peptides not present in unlabeled samples. The experiment was performed independently twice with similar

results. Note that the HPLC gradient here was different from that used in Figure 4 (see Materials and Methods; (4)). See text for additional details.

**FIG. S3.** Persistence of hemispheres of stable old PG indicative of minimal turnover in cells of *S. pneumoniae* TIGR4 and D39 encapsulated strains visualized by long-pulse/chase/new-labeling with FDAA probes. IU1686 (TIGR4) and IU1690 (D39) (see Table S1) were grown exponentially in BHI broth, labeled with HADA (pseudocolored green; old PG), washed, and chased in the presence of either NADA or TADA (pseudocolored red; newly synthesized PG) as described for Figure 2 and in Materials and Methods. Images are representative of >200 individual cells in diplococci or chains of each strain examined in microscopic fields at different time points after the start of the chase/second FDAA labeling in two biological replicates. Scale bar = 1  $\mu$ m. P, phase contrast image; H, HADA labeling (old PG); T, TADA or N, NADA labeling (new PG synthesis); O, overlay of H and T or N images. Note that encapsulated strain D39 forms short chains of cells compared to unencapsulated mutants (Fig. 2) as we reported previously (3).

**FIG. S4.** Persistence of hemispheres of stable old PG indicative of minimal turnover in wild-type (parent) bacteria growing in chemically defined medium (CDM) containing glucose or galactose as carbon source. Strain IU1945 (D39  $\Delta cps$ ) was grown exponentially in CDM medium with the indicated carbon sources, labeled with HADA (pseudocolored green; old PG), washed, and chased in the presence of NADA (pseudocolored red; newly synthesized PG) as described for Figure 2 and in Materials and Methods. Images are representative of >124 individual cells in diplococci or short chains for each growth condition examined in microscope fields at different time points

after the start of the chase/NADA labeling in two biological replicates. Scale bar = 1  $\mu$ m. P, phase contrast image; H, HADA labeling (old PG); N, NADA labeling (new PG synthesis); O, overlay of H and images.

**Fig. S5.** Persistence of hemispheres of stable old PG indicative of minimal turnover in laboratory strain R6 or a D39  $\Delta cps \Delta murMN$  mutant with reduced or no PG cross-bridges, respectively, compared to the D39  $\Delta cps$  parent strain. Cells of EL59 (R6) and IU9709 (D39  $\Delta cps \Delta murMN$ ) (see Table S1) were grown exponentially in BHI broth, labeled with HADA (pseudocolored green; old PG), washed, and chased in the presence of TADA (pseudocolored red; newly synthesized PG) as described for Figure 2 and in Materials and Methods. Images are representative of >200 individual cells in diplococci or short chains of each strain examined in microscopic fields at different time points after the start of the chase/NADA labeling in two biological replicates. Scale bar = 1  $\mu$ m. P, phase contrast image; H, HADA labeling (old PG); T, TADA labeling (new PG synthesis); O, overlay of H and T images. Note that IU9709 and IU1945 (Fig. 2) are isogenic (see Table S1).

**Fig. S6.** Full time courses of long-pulse/chase/new-labeling experiments of the  $\Delta pbp1a$  and PG hydrolase mutants shown in Figure 8. Strains and labeling are described in the legend to Figure 8, which shows only two time-points for each strain. Old PG labeled with HADA is pseudocolored green, whereas regions of new PG synthesis are pseudocolored red. At least two biological replicates were done for each strain. The number of individual cells examined for each strain is indicated. Scale bar = 1  $\mu$ m. P, phase contrast image; H, HADA labeling (old PG); N, NADA labeling (new PG synthesis); O, overlay H and N images.

## REFERENCES

1. **Lanie JA, Ng WL, Kazmierczak KM, Andrzejewski TM, Davidsen TM, Wayne KJ, Tettelin H, Glass JI, Winkler ME. 2007.** Genome sequence of Avery's virulent serotype 2 strain D39 of *Streptococcus pneumoniae* and comparison with that of unencapsulated laboratory strain R6. *J Bacteriol* **189**:38-51.
2. **Tettelin H, Nelson KE, Paulsen IT, Eisen JA, Read TD, Peterson S, Heidelberg J, DeBoy RT, Haft DH, Dodson RJ, Durkin AS, Gwinn M, Kolonay JF, Nelson WC, Peterson JD, Umayam LA, White O, Salzberg SL, Lewis MR, Radune D, Holtzapple E, Khouri H, Wolf AM, Utterback TR, Hansen CL, McDonald LA, Feldblyum TV, Angiuoli S, Dickinson T, Hickey EK, Holt IE, Loftus BJ, Yang F, Smith HO, Venter JC, Dougherty BA, Morrison DA, Hollingshead SK, Fraser CM. 2001.** Complete genome sequence of a virulent isolate of *Streptococcus pneumoniae*. *Science* **293**:498-506.
3. **Barendt SM, Land AD, Sham LT, Ng WL, Tsui HC, Arnold RJ, Winkler ME. 2009.** Influences of capsule on cell shape and chain formation of wild-type and *pcsB* mutants of serotype 2 *Streptococcus pneumoniae*. *J Bacteriol* **191**:3024-3040.
4. **Barendt SM, Sham LT, Winkler ME. 2011.** Characterization of mutants deficient in the L,D-carboxypeptidase (DacB) and WalRK (VicRK) regulon, involved in peptidoglycan maturation of *Streptococcus pneumoniae* serotype 2 strain D39. *J Bacteriol* **193**:2290-2300.
5. **Tsui HC, Keen SK, Sham LT, Wayne KJ, Winkler ME. 2011.** Dynamic distribution of the SecA and SecY translocase subunits and septal localization of the HtrA



surface chaperone/protease during *Streptococcus pneumoniae* D39 cell Division.  
mBio **2**:pii: e00202-00211.

6. **Garcia-Bustos J, Tomasz A.** 1990. A biological price of antibiotic resistance: major changes in the peptidoglycan structure of penicillin-resistant pneumococci. Proc Nat Acad Sci USA **87**:5415-5419.

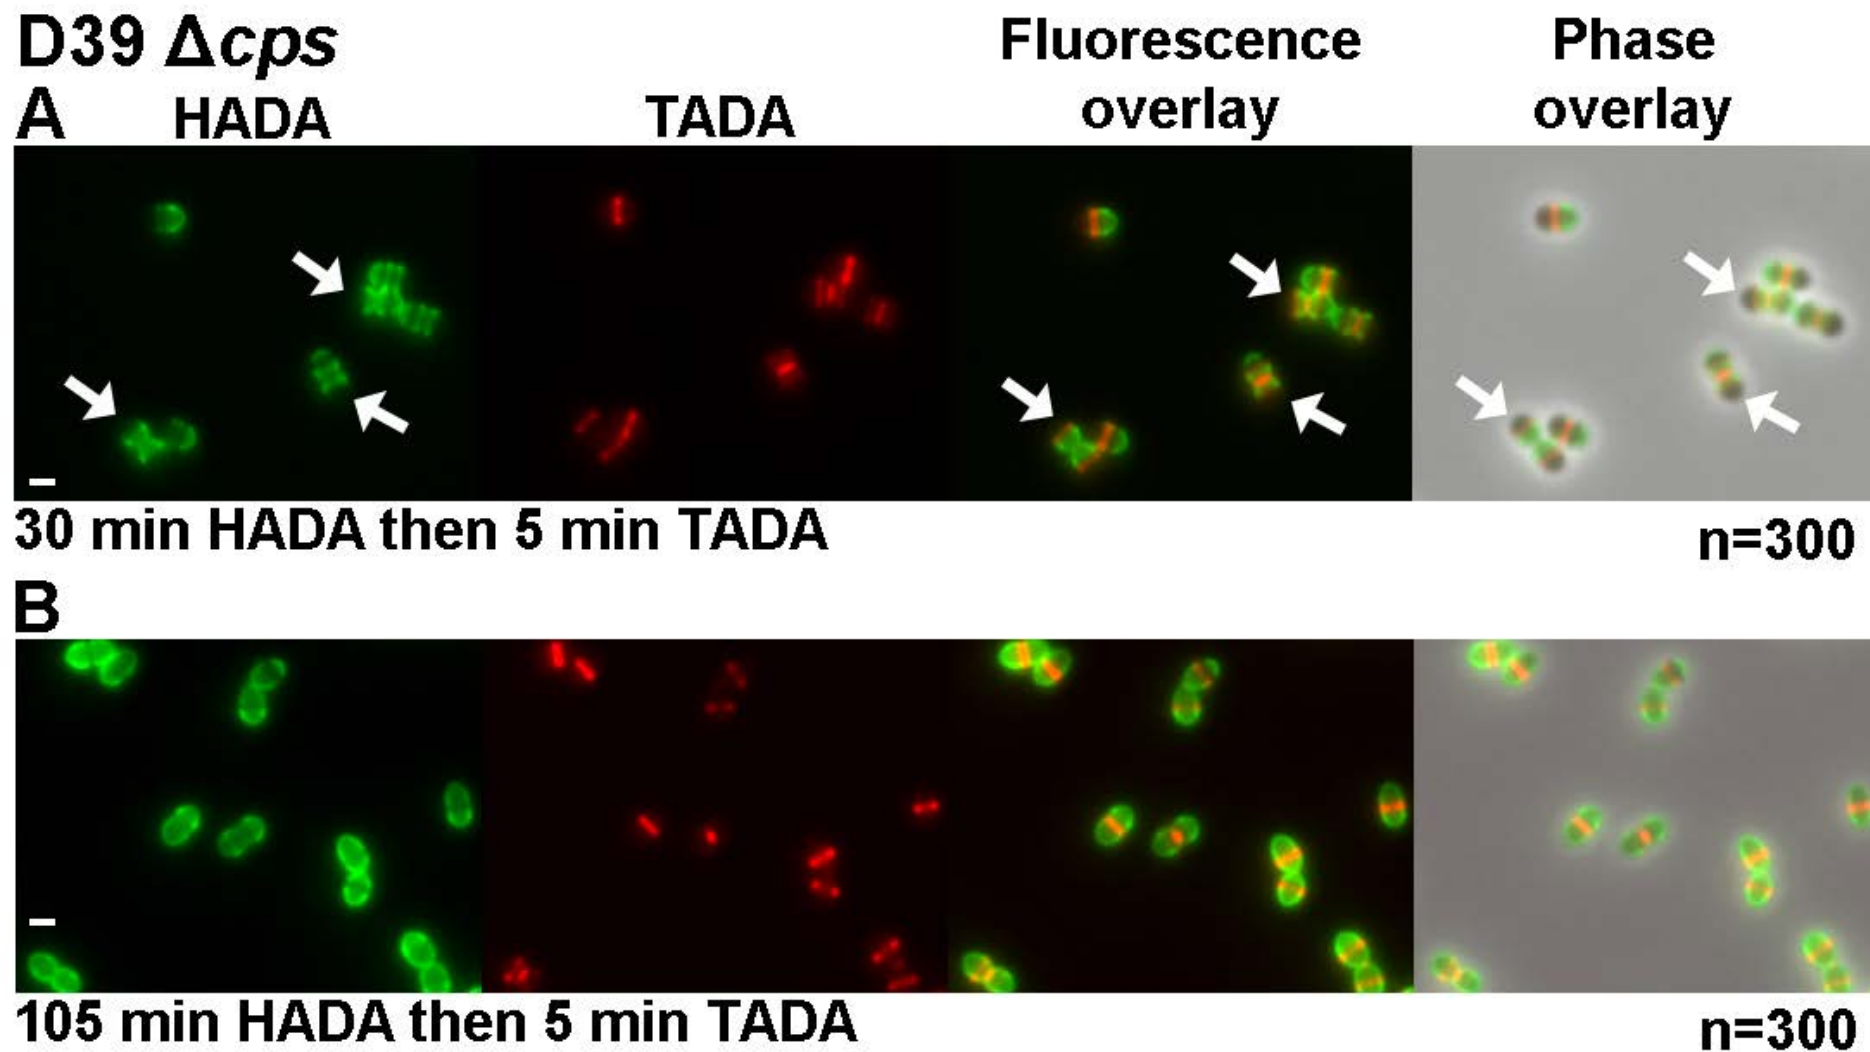

**Fig. S1**

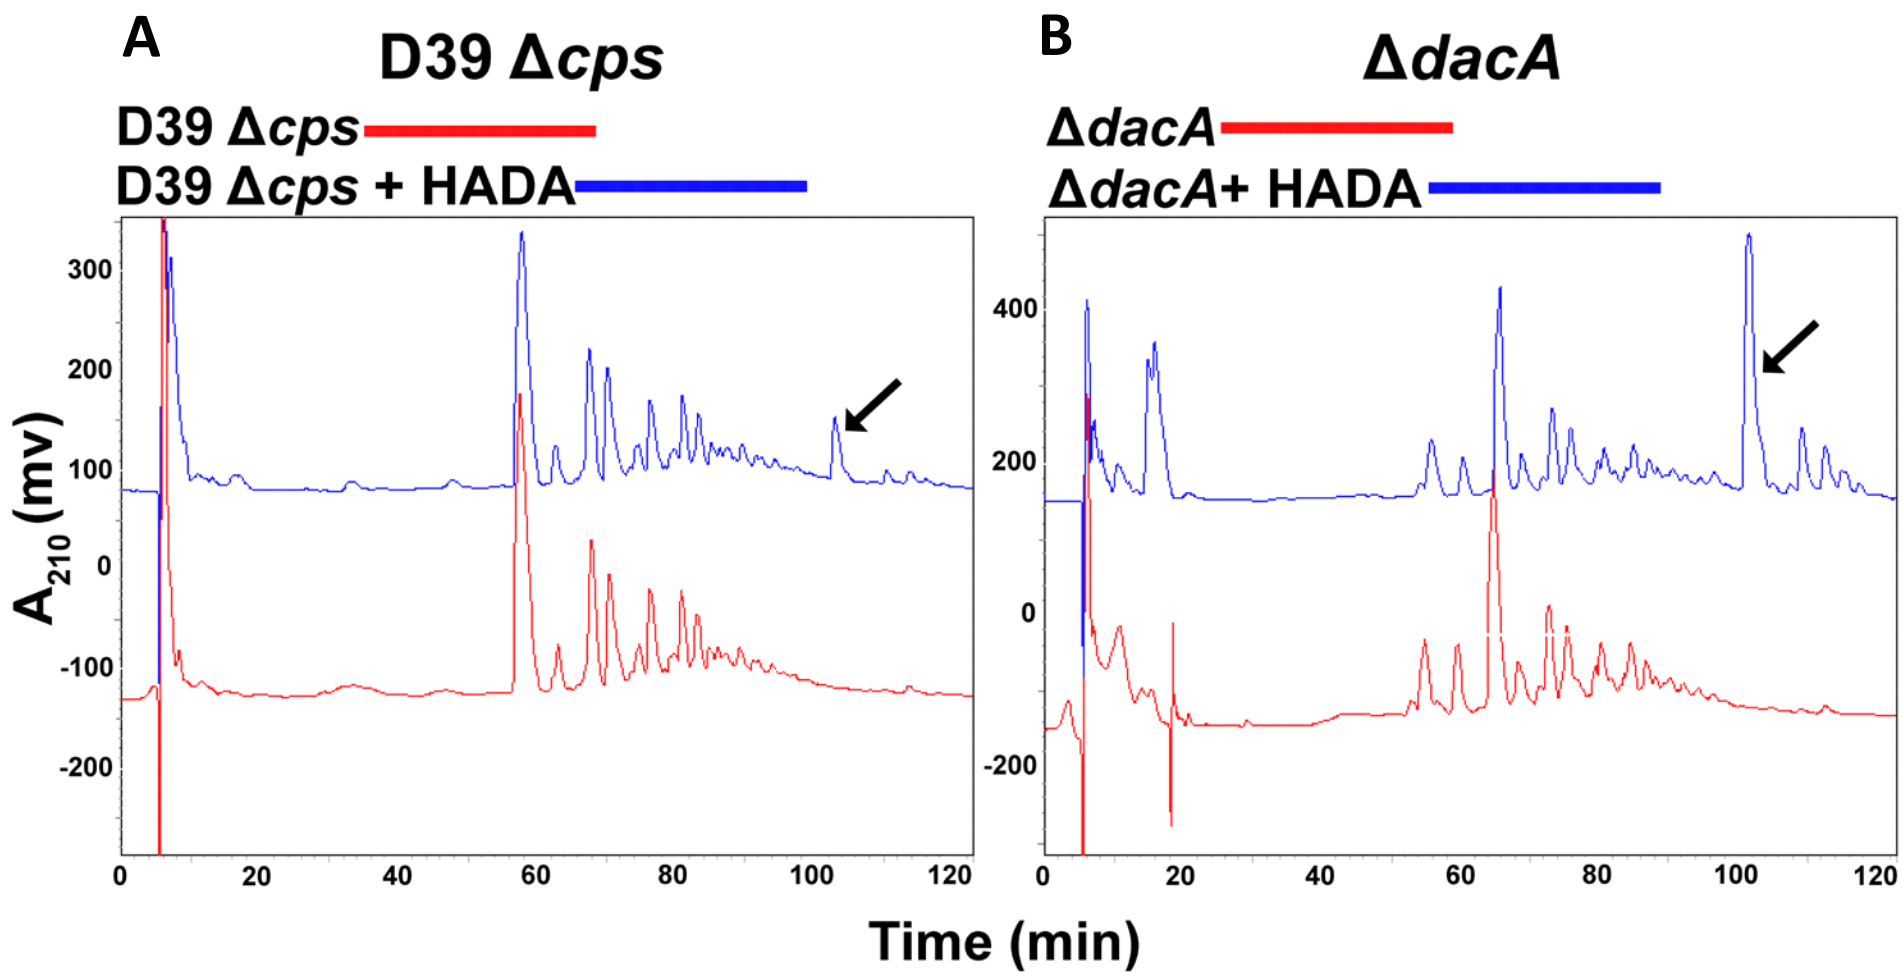

Fig. S2

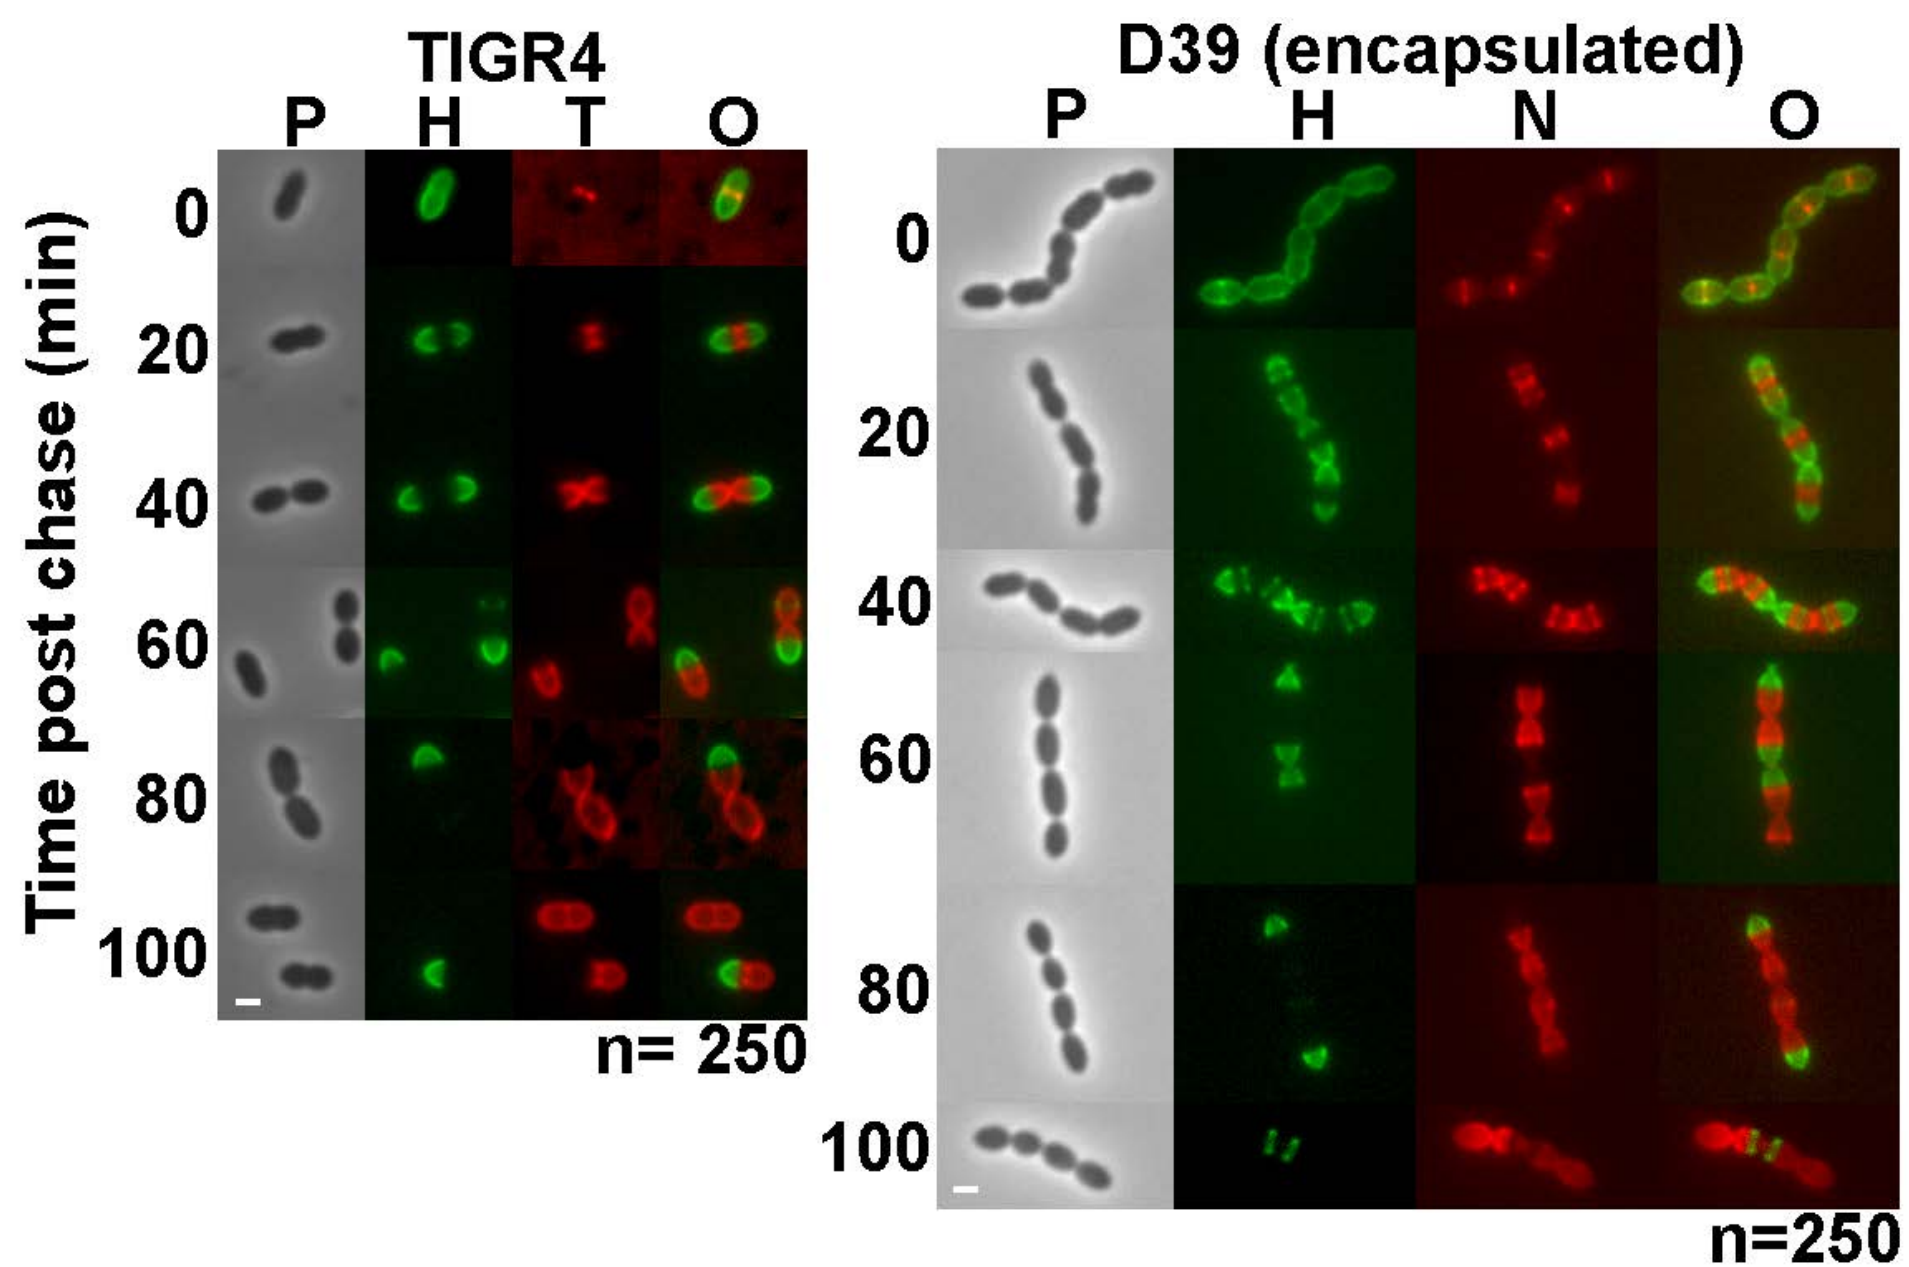

Fig. S3

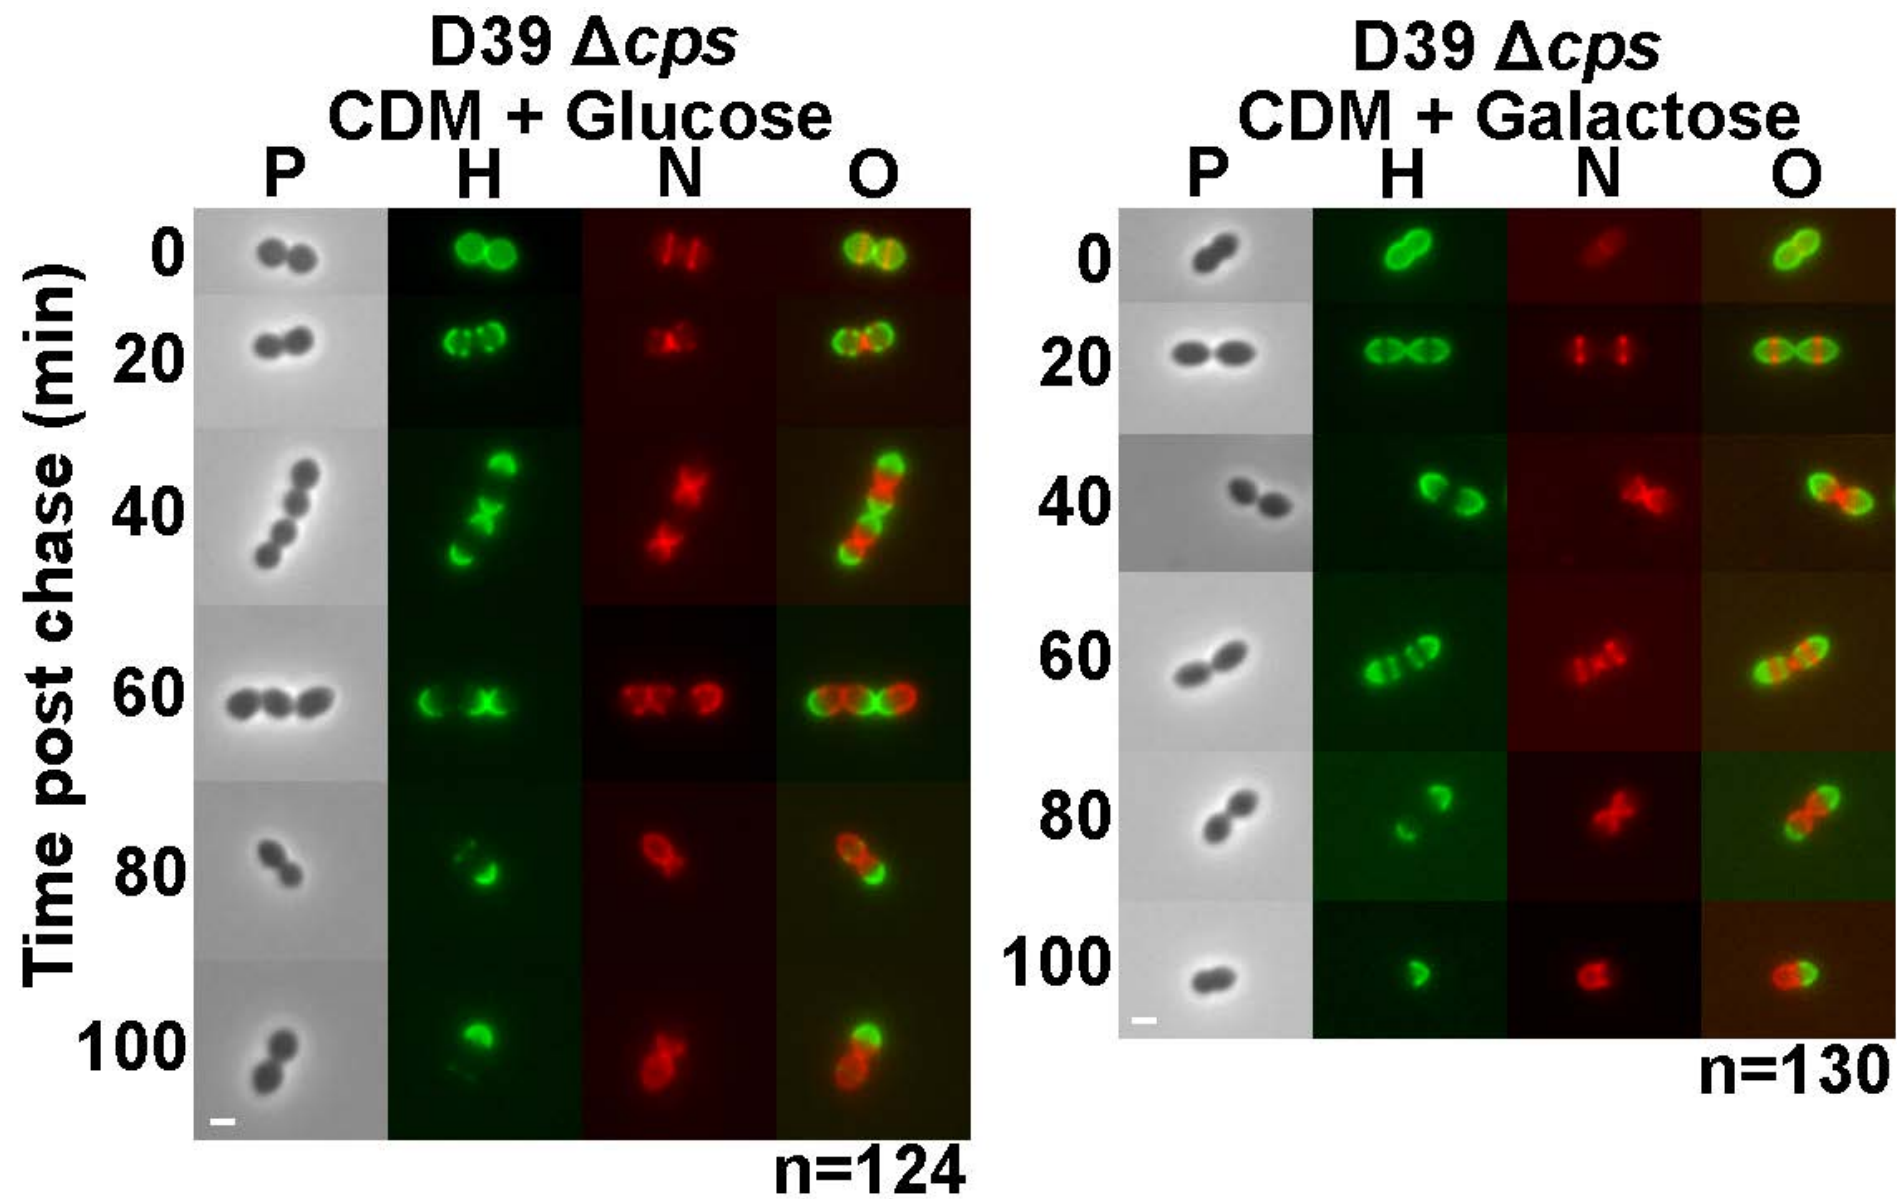

Fig. S4

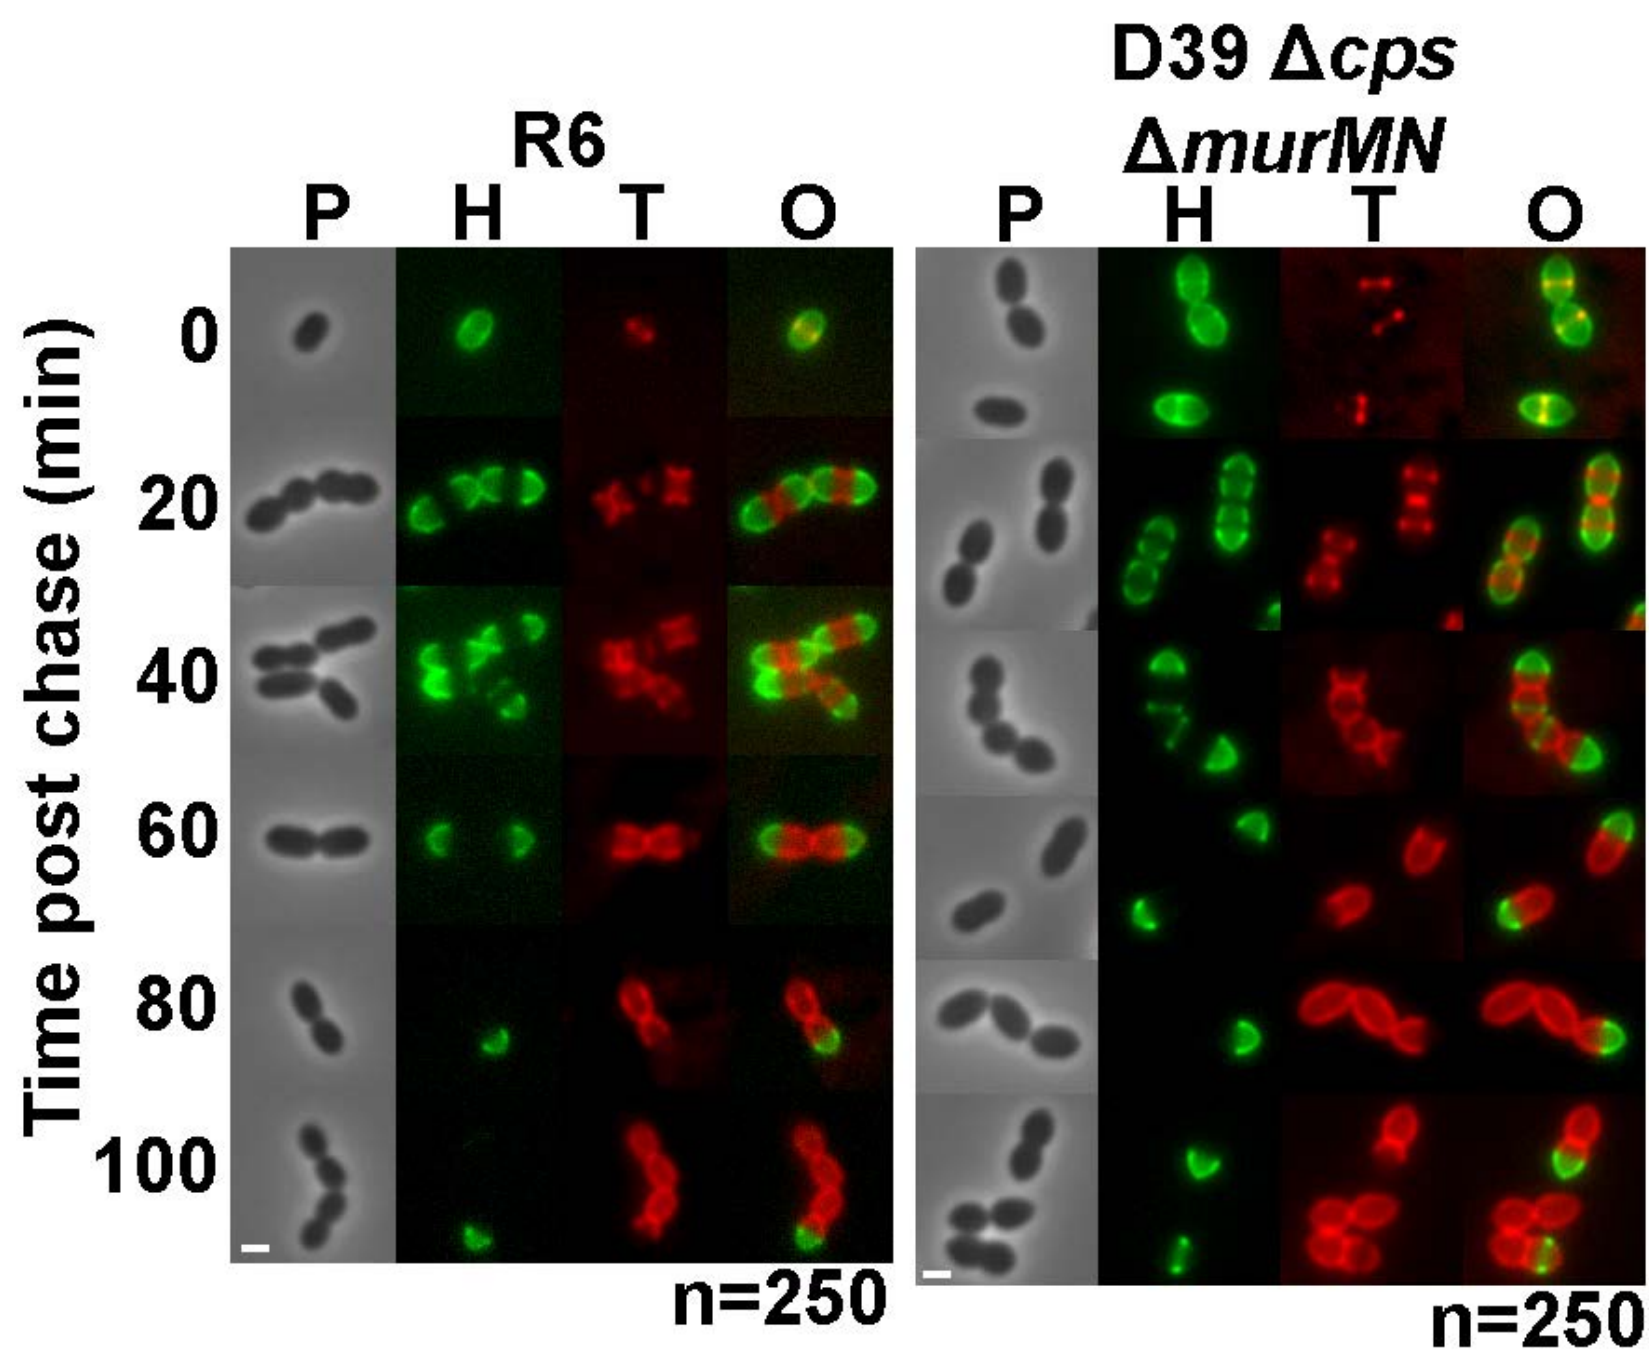

Fig. S5



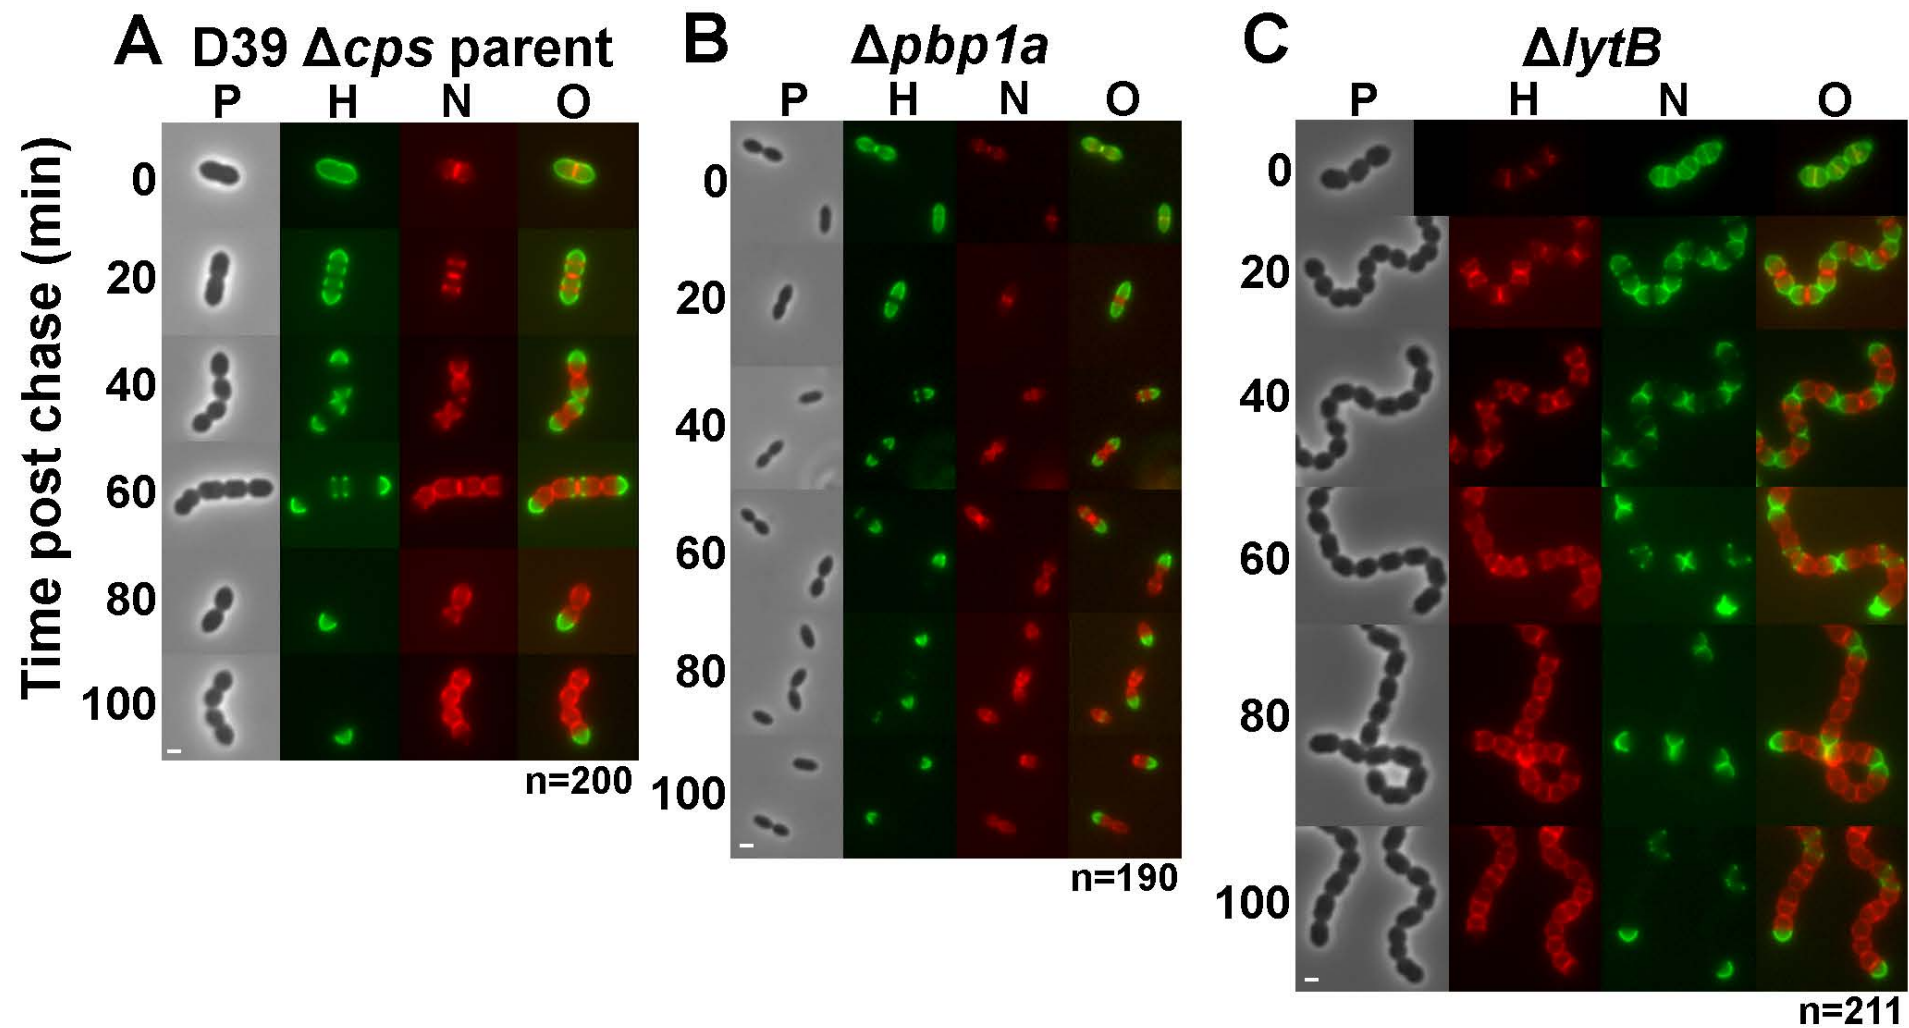

Fig. S6 (continued on next pages)

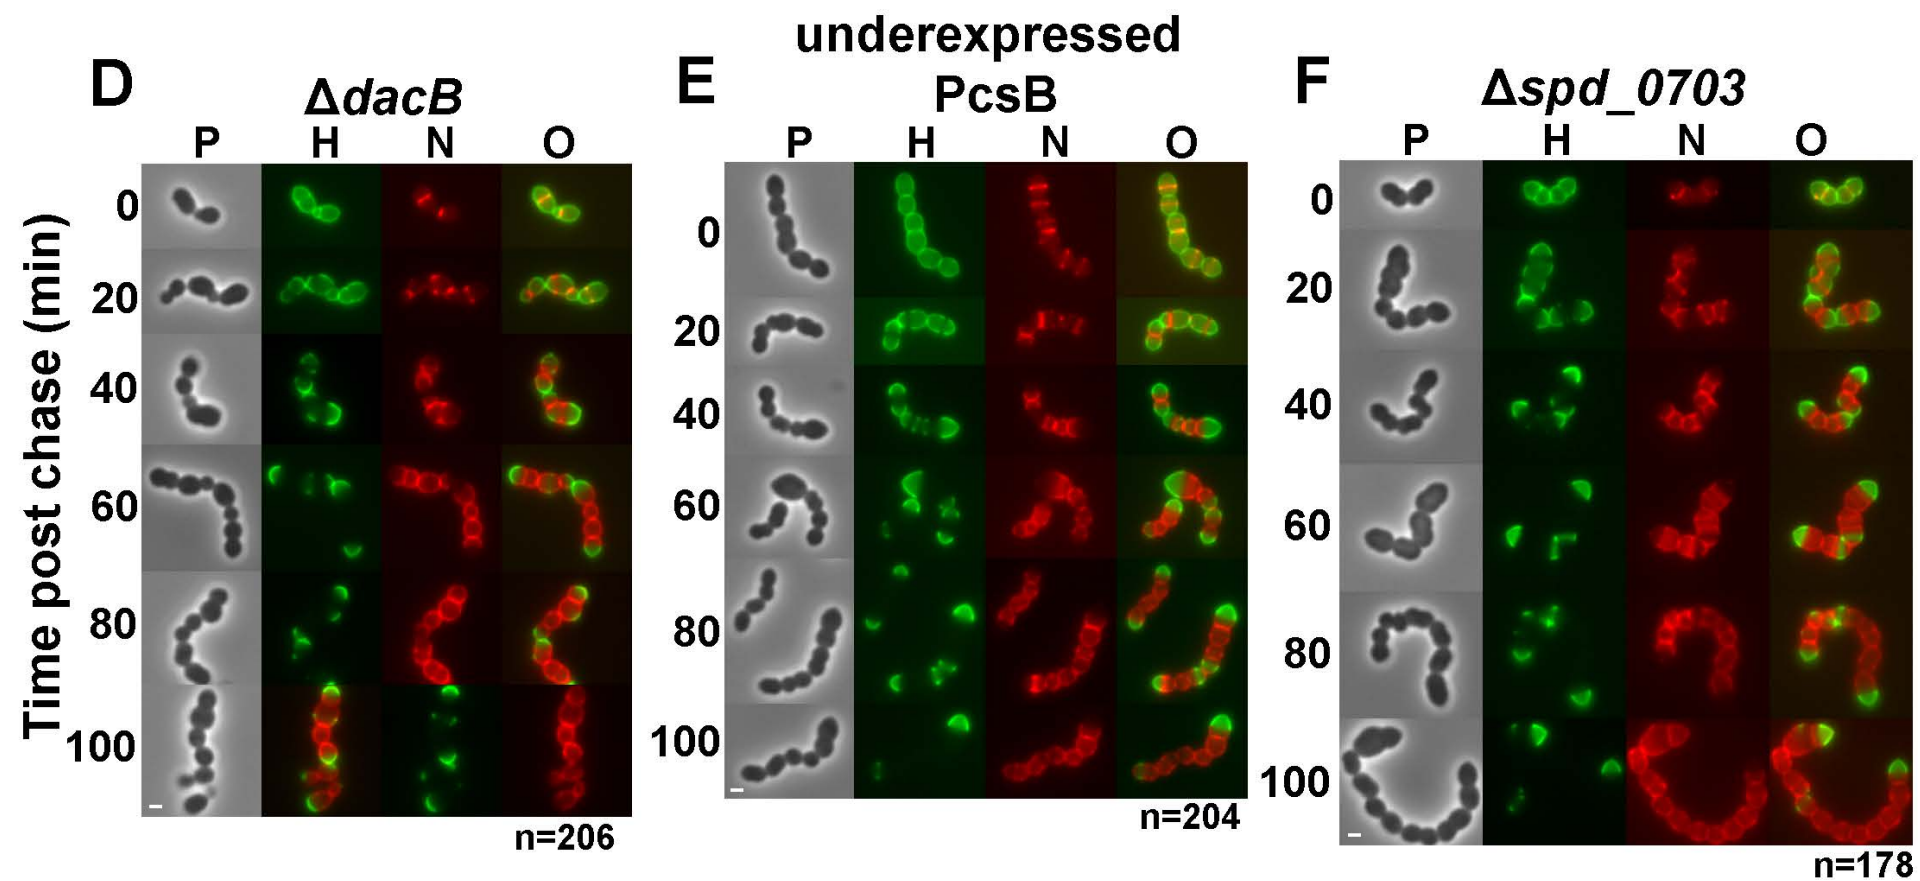

Fig. S6 (continued on next pages)



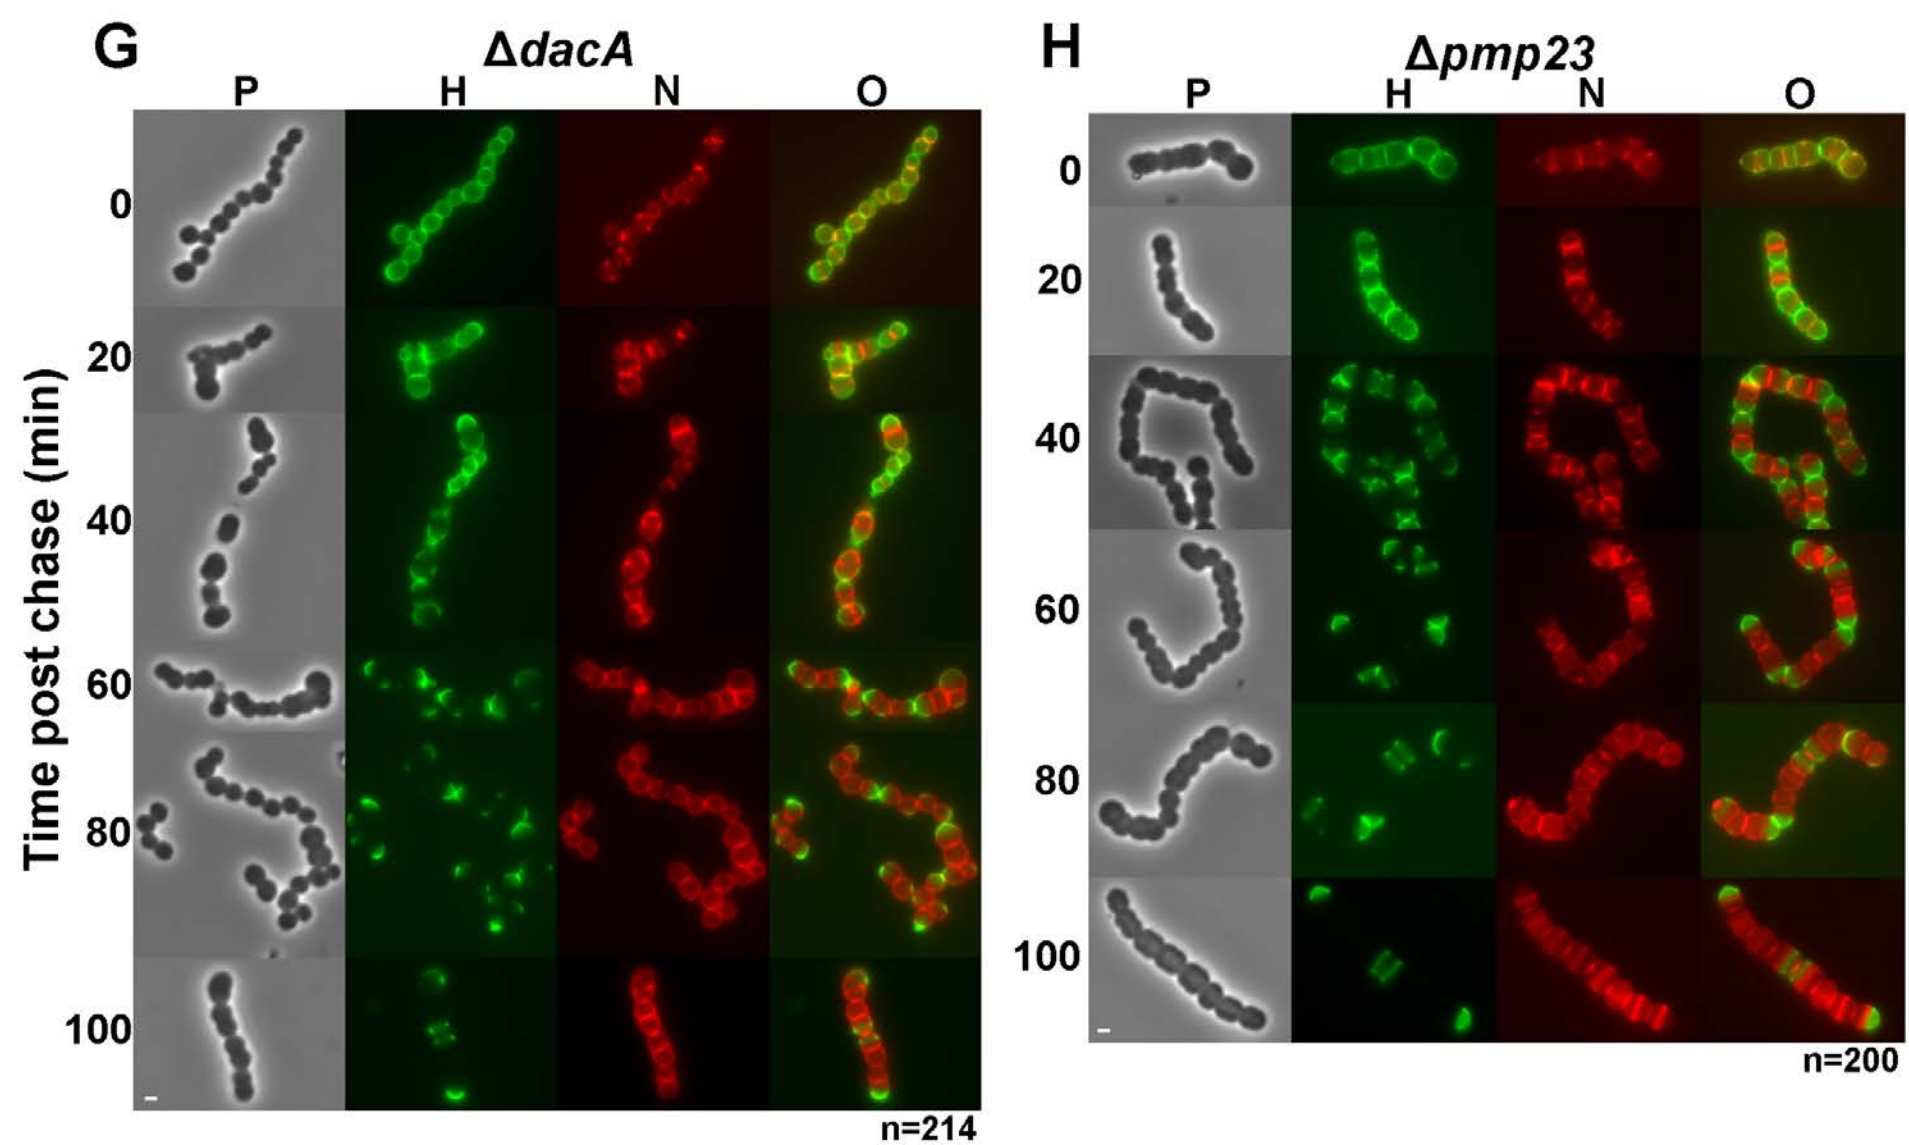

Fig. S6 (continued)
